# Supplementary material for: Biocomposites from the reinforcement of a tung oil-based thermosetting resin with collagen
Source: Royal Society of Chemistry journal article supplement (doi:10.1039/c7qm00112f), 2017-01-01
Supplement: c7qm00112f5.pdf [file c7qm00112f5.pdf]

### **Supplementary Information**

**Figure S1.** TGA and DTG curves for the collagen I+III mixture.

**Figure S2.** DSC curves of (a) collagen I+III mixture, (b) type I collagen, and (c) collagen extracted from beef tendons.

**Figure S3.** Heat-cool-heat DSC curve of collagen extracted from beef tendons.

**Figure S4.** CD spectra of (a) collagen extracted from beef tendons, (b) type I collagen, and (c) collagen I+III mixture. All spectra were acquired at 5°C.

**Table S1.** Preliminary experiments using the commercial mixture of collagen I+III. All samples were cured at 140°C for 15 hours.
