# Supplementary material for: Biocomposites from the reinforcement of a tung oil-based thermosetting resin with collagen
Source: Royal Society of Chemistry journal article supplement (doi:10.1039/c7qm00112f), 2017-01-01
Supplement: c7qm00112f6.pdf [file c7qm00112f6.pdf]

**Table S1.** Preliminary experiments using the commercial mixture of collagen I+III. All samples were cured at 140°C for 15 hours.

| <b>Entry</b> | <b>Tung oil content (g)</b> | <b>BMA content (g)</b> | <b>DVB content (g)</b> | <b>Asolectin content (g)</b> | <b>Collagen content (wt%)</b> | <b>Outcome</b>         |
|--------------|-----------------------------|------------------------|------------------------|------------------------------|-------------------------------|------------------------|
| 1            | 6.0                         | 1.0                    | 2.0                    | 1.0                          | -                             | Unpolymerized material |
| 2            | 5.0                         | 3.5                    | 1.5                    | -                            | 10-75                         | Phase separation       |
| 3            | 4.0                         | 3.0                    | 2.0                    | 1.0                          | 0-10                          | Cracks/bubbles         |
