# Supplementary figures and images for: Biocomposites from the reinforcement of a tung oil-based thermosetting resin with collagen
Source: Royal Society of Chemistry journal article supplement (doi:10.1039/c7qm00112f), 2017-01-01

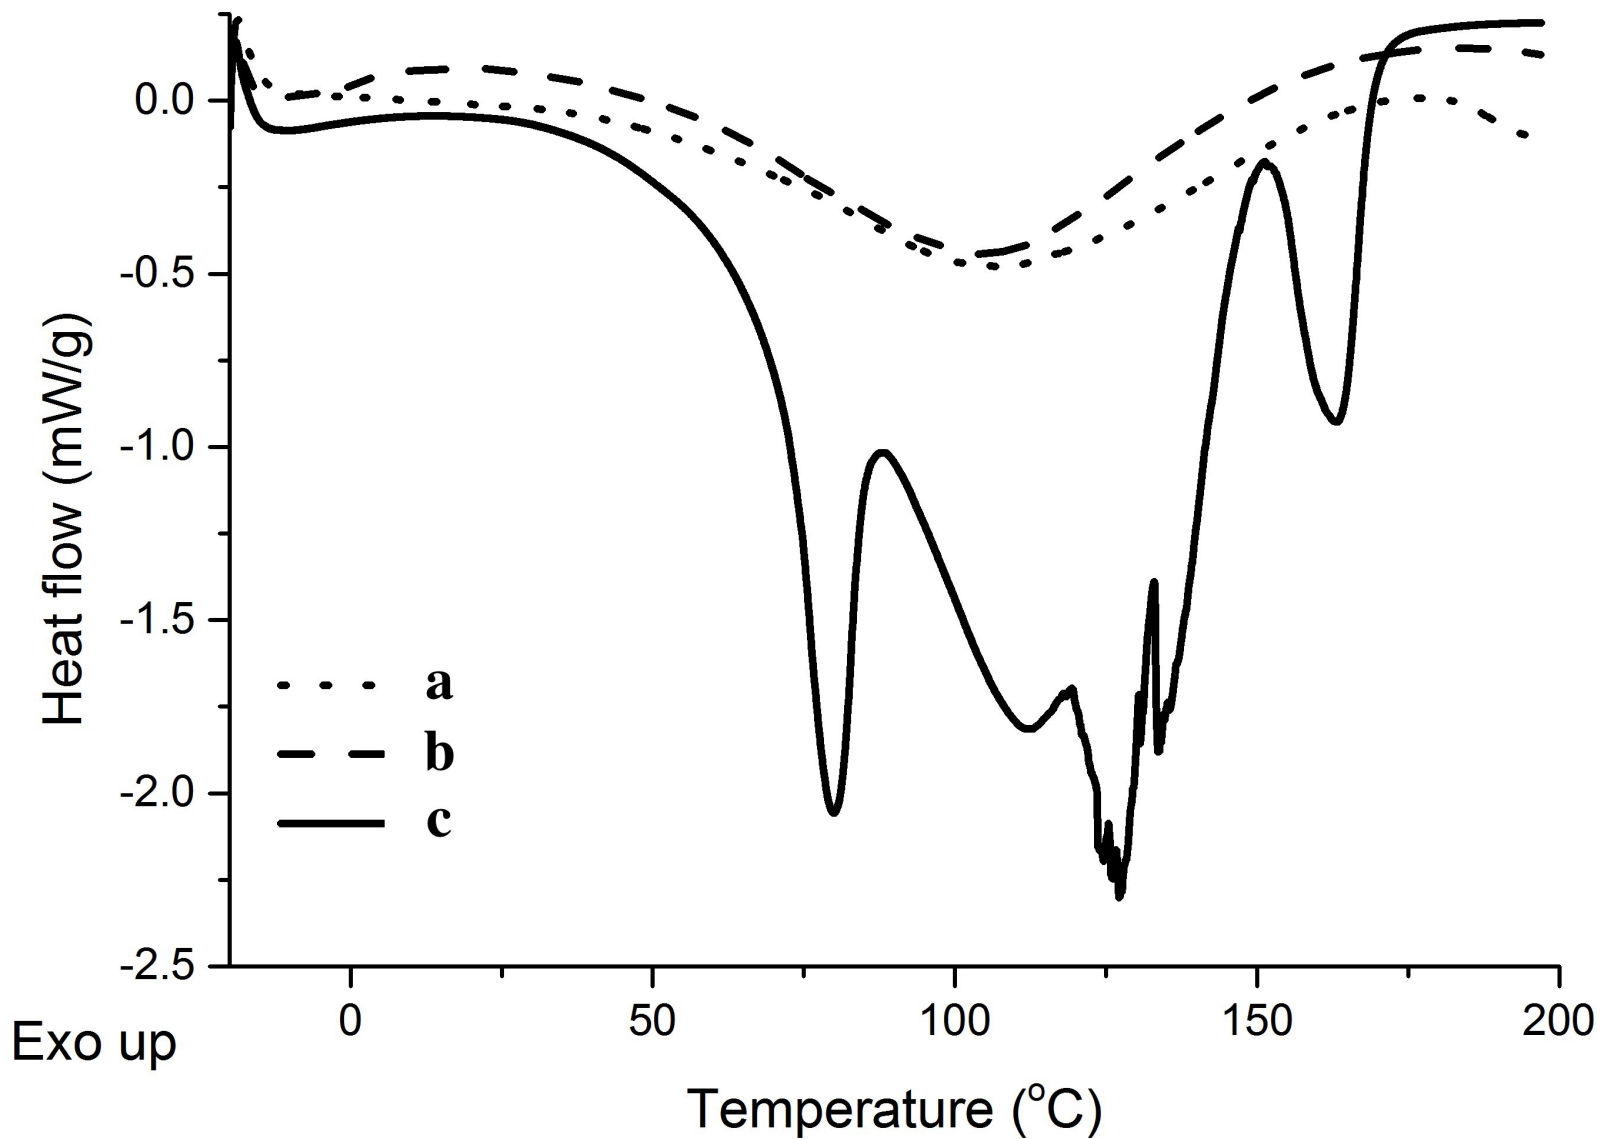

Supplement: c7qm00112f2.pdf [file c7qm00112f2.pdf]
